# Supplementary material for: Sanidine in obsidian and its applicability in neutron flux monitor development for 40Ar/39Ar dating
Source: Royal Society of Chemistry journal article supplement (doi:10.1039/d2ja00266c), 2022-01-01
Supplement: d2ja00266c1.xlsx [file d2ja00266c1.xlsx]

## Sheet: Table S1 Major element
Table S1. Major element composition of the Yunshan sanidine (wt.%)
Point	Na2O	K2O	SiO2	FeO	CaO	Al2O3	MnO	P2O5	MgO	Cr2O3	SrO	TiO2	BaO	Total	K/Ca	An	Or	Ab
grain1-1	4.708	7.961	66.969	0.183	0.147	19.775	-	0.041	-	-	0.139	0.024	-	99.947	63.1825	1.14343	51.6036	47.2529
grain1-2	4.912	7.964	67.267	0.161	0.159	19.488	0.002	0.017	-	-	0.068	0.045	-	100.083	58.4361	1.21062	50.5315	48.2579
grain1-3	5.021	7.941	67.002	0.184	0.173	19.618	0.046	0.049	-	-	0.117	0.077	0.135	100.363	53.552	1.30377	49.8711	48.8251
grain1-4	4.67	7.848	67.314	0.271	0.148	19.45	-	-	0.011	0.009	0.042	0.057	0.036	99.856	61.8649	1.16409	51.4401	47.3958
grain1-5	5.134	7.914	66.708	0.205	0.131	19.619	-	0.005	-	0.02	-	-	-	99.736	70.4809	0.981235	49.3988	49.6199
grain1-6	4.856	7.963	66.823	0.202	0.158	19.583	-	0.032	-	0.029	0.13	-	-	99.776	58.7985	1.20983	50.8118	47.9784
grain1-7	4.917	7.742	67.154	0.212	0.13	19.67	0.024	0.014	-	0.013	0.094	0.049	0.117	100.136	69.4795	1.00571	49.9116	49.0827
grain1-8	5.186	7.843	67.325	0.199	0.145	19.593	-	-	-	-	0.107	0.037	0.154	100.589	63.1046	1.08432	48.8754	50.0403
grain1-9	4.902	8.099	66.919	0.234	0.167	19.374	0.044	-	-	-	0.105	0.029	-	99.873	56.5798	1.2612	50.9705	47.7683
grain1-10	5.156	8.08	66.919	0.224	0.146	19.6	-	0.006	-	-	-	0.02	-	100.151	64.5662	1.07891	49.7577	49.1634
grain1-11	5.026	8.056	67.479	0.235	0.147	19.449	-	-	-	-	0.079	-	-	100.471	63.9365	1.1015	50.3041	48.5944
grain1-12	4.879	8.138	67.55	0.215	0.13	19.518	0.006	0.024	-	-	0.107	0.012	-	100.579	73.0333	0.984315	51.3484	47.6672
grain1-13	5.037	7.967	67.517	0.24	0.145	19.658	-	-	-	0.018	0.07	0.02	0.136	100.808	64.1023	1.09158	49.9805	48.928
grain1-14	5.058	8.015	67.42	0.218	0.152	19.586	-	-	-	0.002	-	-	-	100.451	61.5186	1.13793	50.0027	48.8594
grain1-15	5.218	7.916	67.003	0.211	0.145	19.621	-	-	-	0.009	0.149	0.065	-	100.337	63.692	1.0761	48.9564	49.9675
grain1-16	4.835	7.949	67.596	0.197	0.144	19.763	-	-	-	-	0.079	0.049	0.073	100.685	64.4016	1.10711	50.9282	47.9647
grain1-17	4.994	8.077	67.104	0.205	0.127	19.63	-	-	-	-	-	-	0.009	100.146	74.1982	0.954765	50.6013	48.4439
grain1-18	4.924	8.112	67.127	0.26	0.14	19.31	0.042	0.006	-	-	0.028	-	-	99.949	67.6	1.05632	51.0052	47.9385
grain1-19	4.905	8.01	67.165	0.211	0.149	19.651	0.026	-	-	-	0.075	-	0.018	100.21	62.7181	1.13282	50.7488	48.1184
grain1-20	5.016	7.972	67.345	0.246	0.138	19.839	-	-	0.006	-	-	0.065	0.027	100.654	67.3961	1.04123	50.1248	48.834
grain2-1	6.188	7.931	65.576	0.223	0.157	19.134	-	-	-	-	0.11	-	0.054	99.373	58.9352	1.06436	44.8058	54.1298
grain2-2	6.036	7.966	65.873	0.204	0.152	19.038	0.033	0.011	-	-	0.015	0.045	0.027	99.4	61.1425	1.04262	45.5344	53.423
grain2-3	6.172	8.049	65.318	0.268	0.154	19.076	0.018	-	-	0.02	0.072	0.057	0.009	99.213	60.9773	1.03876	45.2434	53.7179
grain2-4	6.003	7.885	65.862	0.254	0.153	19.208	-	-	-	0.018	0.261	0.073	0.072	99.789	60.1253	1.05739	45.4112	53.5314
grain2-5	5.962	7.891	65.902	0.127	0.137	19.177	-	-	-	0.011	0.092	-	-	99.299	67.1983	0.95101	45.6473	53.4017
grain2-6	6.16	7.99	65.8	0.2	0.162	19.179	-	-	0.004	0.042	0.215	-	-	99.752	57.5412	1.09691	45.084	53.8191
grain2-7	6.165	7.966	65.726	0.193	0.153	19.125	0.005	0.097	-	-	-	0.028	-	99.458	60.7429	1.03756	45.0173	53.9451
grain2-8	6.124	7.899	66.033	0.216	0.142	19.197	0.011	-	-	0.002	0.336	0.028	-	99.988	64.8979	0.970845	45.0041	54.025
grain2-9	6.055	7.921	65.488	0.225	0.133	19.157	-	0.078	-	-	0.152	-	-	99.209	69.4825	0.914294	45.3767	53.709
grain2-10	6.152	8.104	65.644	0.252	0.155	19.294	0.024	0.001	-	-	0.05	0.012	-	99.688	60.9978	1.04402	45.488	53.4679
grain2-11	6.058	7.933	65.868	0.221	0.144	19.122	-	-	-	-	0.178	-	0.072	99.596	64.272	0.988223	45.3679	53.6439
grain2-12	5.899	7.958	66.05	0.216	0.158	19.213	-	-	-	-	-	0.069	-	99.563	58.7616	1.09712	46.0491	52.8537
grain2-13	6.327	7.993	65.714	0.265	0.151	19.259	0.066	0.041	-	-	0.109	-	-	99.925	61.7561	1.0083	44.4776	54.5141
grain2-14	5.929	8.027	65.998	0.225	0.134	18.975	0.009	-	-	0.02	0.048	0.024	0.027	99.416	69.8868	0.925831	46.2167	52.8575
grain2-15	6.242	7.977	65.762	0.258	0.141	19.137	0.018	0.075	-	0.042	0.125	-	0.018	99.795	66.0035	0.949962	44.7863	54.2637
grain2-16	6.109	8.009	66.193	0.204	0.151	19.213	-	0.094	-	-	0.212	-	-	100.185	61.8797	1.02667	45.3786	53.5948
grain2-17	6.152	7.874	66.025	0.207	0.139	19.258	0.037	-	-	0.009	0.137	-	0.055	99.893	66.0887	0.949536	44.824	54.2265
grain3-1	5.012	7.989	66.626	0.214	0.11	19.381	0.015	-	0.002	0.02	0.074	0.037	-	99.48	84.7318	0.831155	50.3038	48.8651
grain3-2	5.369	7.974	66.555	0.246	0.124	19.541	-	0.01	-	-	-	0.029	-	99.848	75.0242	0.905325	48.5152	50.5795
grain3-3	4.96	8.05	67.57	0.181	0.143	19.477	0.007	0.05	-	0.029	0.178	-	-	100.645	65.676	1.07914	50.6238	48.297
grain3-4	5.148	8.117	67.282	0.208	0.139	19.462	0.011	-	-	0.007	0.127	0.016	-	100.517	68.1283	1.02615	49.9357	49.0381
grain3-5	5.305	7.99	67.209	0.202	0.148	19.672	0.02	-	-	0.009	0.129	-	0.018	100.702	62.9842	1.08413	48.7737	50.1422
grain3-6	5.094	7.972	67.283	0.211	0.127	19.24	-	0.054	-	0.007	0.084	-	-	100.072	73.2336	0.951793	49.788	49.2602
grain3-7	5.189	7.999	67.444	0.254	0.14	19.606	0.026	0.04	-	0.015	0.097	0.016	-	100.826	66.6583	1.03694	49.3717	49.5913
grain3-8	5.472	8.074	67.104	0.224	0.142	19.78	0.013	-	-	-	-	-	-	100.809	66.3357	1.01931	48.2976	50.6831
grain3-9	5.191	7.906	67.11	0.192	0.128	19.58	0.031	0.03	-	-	0.064	0.029	-	100.261	72.0599	0.954199	49.1139	49.9319
grain3-10	5.168	7.999	67.228	0.165	0.136	19.687	-	-	-	0.033	0.022	-	-	100.438	68.6189	1.00963	49.4857	49.5047
grain3-11	5.039	7.979	66.684	0.232	0.133	19.51	0.031	0.025	-	0.033	0.028	0.008	-	99.702	69.9912	1.0012	50.0536	48.9452
grain3-12	5.156	8.048	66.783	0.231	0.136	19.495	0.004	0.007	-	-	0.111	0.021	0.055	100.047	69.0392	1.00774	49.6953	49.2969
grain3-13	5.122	7.998	66.938	0.197	0.122	19.687	-	-	-	0.036	0.17	0.053	0.055	100.378	76.4836	0.910717	49.7535	49.3357
grain3-14	5.3	8.088	66.828	0.246	0.138	19.512	-	0.031	-	0.007	0.069	0.012	-	100.231	68.3768	1.00607	49.1371	49.8568
grain3-15	5.306	7.979	66.706	0.21	0.148	19.56	-	-	-	-	0.074	-	0.101	100.084	62.8975	1.08476	48.7346	50.1806
grain3-16	5.277	8.002	66.756	0.242	0.139	19.541	-	0.014	-	0.016	0.015	-	0.009	100.011	67.1631	1.02083	48.9729	50.0062
grain3-17	5.335	7.97	66.611	0.21	0.145	19.541	0.011	-	-	0.051	0.093	-	-	99.967	64.1264	1.06068	48.5838	50.3555
grain3-18	5.4	8.009	67.115	0.2	0.152	19.769	0.02	0.036	-	0.031	0.047	0.029	-	100.808	61.4726	1.10194	48.3849	50.5132
grain3-19	5.406	7.982	67.043	0.22	0.137	19.764	-	0.013	-	0.042	0.071	-	0.009	100.687	67.9732	0.995339	48.326	50.6786
grain3-20	5.294	8.005	67.058	0.172	0.137	19.617	0.011	-	-	-	0.059	-	0.037	100.39	68.1691	1.00449	48.9107	50.0848
grain4-1	5.276	7.962	66.73	0.25	0.168	19.616	0.013	-	-	-	0.221	0.025	-	100.261	55.2917	1.23432	48.7483	50.0174
grain4-2	4.956	7.935	67.37	0.235	0.148	19.723	-	-	-	-	0.084	0.025	-	100.476	62.5507	1.12502	50.2648	48.6102
grain4-3	5.135	7.788	67.401	0.225	0.16	19.775	-	-	-	-	0.108	-	-	100.592	56.7875	1.2052	48.8859	49.9089
grain4-4	5.042	7.87	66.786	0.219	0.138	19.48	0.017	-	-	0.027	0.009	0.049	-	99.637	66.5338	1.04529	49.6763	49.2784
grain4-5	5.232	7.854	66.639	0.192	0.163	19.591	0.009	-	-	0.002	0.074	0.012	0.018	99.786	56.2147	1.21109	48.6293	50.1596
grain4-6	4.935	7.962	67.061	0.224	0.158	19.521	-	0.061	0.001	-	0.096	0.025	-	100.044	58.7911	1.20054	50.4151	48.3844
grain4-7	5.098	7.882	66.905	0.236	0.173	19.726	-	-	-	-	-	0.078	-	100.098	53.1541	1.29886	49.314	49.3871
grain4-8	5.15	7.795	67.01	0.252	0.156	19.432	0.022	0.113	0.005	0.004	0.046	0.021	0.027	100.033	58.2959	1.1732	48.8519	49.9749
grain4-9	5.117	7.945	67.809	0.207	0.169	19.579	0.006	-	-	-	0.035	0.012	-	100.879	54.8471	1.26191	49.4372	49.3009
grain4-10	5.056	7.775	66.825	0.219	0.168	19.543	-	0.021	-	-	-	-	0.027	99.634	53.9931	1.27553	49.1925	49.5319
grain4-11	4.889	7.955	67.729	0.19	0.168	19.626	0.007	0.027	0.001	0.02	0.018	0.012	-	100.642	55.2431	1.2819	50.5829	48.1352
grain4-12	5.043	7.877	66.736	0.233	0.178	19.389	0.007	-	-	-	0.072	-	0.218	99.753	51.6283	1.34347	49.5436	49.1129
grain4-13	4.896	7.823	67.427	0.188	0.166	19.69	0.011	-	-	0.013	0.013	-	-	100.227	54.9809	1.27667	50.1375	48.5859
grain4-14	5.212	7.842	67.583	0.243	0.156	19.598	-	-	0.008	-	0.068	0.012	-	100.722	58.6474	1.16278	48.7099	50.1273
grain4-15	4.702	7.8	67.303	0.273	0.174	19.101	-	0.001	-	0.002	-	-	-	99.356	52.2989	1.36566	51.016	47.6183
grain4-16	4.784	7.761	67.661	0.25	0.163	19.613	-	-	-	0.02	-	-	0.073	100.325	55.5491	1.2731	50.5139	48.213
grain4-17	5.182	7.787	67.425	0.228	0.173	19.815	0.017	-	-	-	0.152	0.053	-	100.832	52.5135	1.29601	48.613	50.091

## Sheet: Table S2 40Ar39Ar dating
Table S2. 40Ar/39Ar dating results
Steps	Laser heating		36Arair	37ArCa	38ArCl	39ArK	40Ar*	Age	± 2σ	40Ar* (%)	39ArK (%)	Ratio and error for inverse isochron				K/Ca	± 2σ
								Ma				39Ar/40Ar	± 2σ	36Ar/40Ar	± 2σ
YS01-01, J = 0.00567629 ± 0.00000114									Stepwise heating
1	4		40.6296	10.6136	0.828811	45.0829	141.937	32.0251	42.3966	1.15654	0.0931267	0.00367354	0.000429619	0.00331067	4.70213e-05	1.82649	0.861906
2	5		46.1557	5.92435	1.22794	179.032	1322.31	74.2531	11.2415	8.75493	0.369822	0.0118544	0.000361132	0.00305615	3.87703e-05	12.9945	10.7881
3	6.8		74.6672	7.83005	1.64268	603.671	5302.92	87.9764	4.4285	19.2141	1.24699	0.0218756	0.000218493	0.00270577	2.66947e-05	33.1515	19.5106
4	7.8	Δ	12.28	4.35562	0.390433	545.176	5072.82	93.0567	2.7849	58.0256	1.12616	0.0623834	0.00104621	0.00140517	3.76712e-05	53.8215	58.2694
5	9	Δ	21.0126	5.84137	0.573944	799.774	7411.56	92.6878	2.00633	54.1391	1.65208	0.0584413	0.000648761	0.00153544	2.6571e-05	58.8737	48.4361
6	10.2	Δ	23.4486	11.8352	1.01008	1175.45	10909.9	92.828	1.39957	60.8889	2.42811	0.0656285	0.000544553	0.00130919	2.01676e-05	42.7071	17.1775
7	11.5	Δ	52.4288	14.4903	1.86797	1738.36	16049	92.3481	1.24917	50.6077	3.59089	0.0548343	0.000289927	0.0016538	1.69554e-05	51.5859	18.0176
8	13	Δ	85.3494	24.2065	3.20962	2935.47	27192.5	92.6524	1.02044	51.6066	6.06373	0.0557285	0.00020131	0.00162032	1.45397e-05	52.1451	9.93171
9	14	Δ	110.877	25.0674	3.13955	3028.5	27973.7	92.3928	1.20834	45.7871	6.2559	0.0495849	0.000167743	0.00181536	1.57297e-05	51.95	10.2084
10	14	Δ	103.337	24.9102	3.04667	2984.64	27724.6	92.9026	1.15879	47.3158	6.1653	0.0509524	0.000175029	0.00176413	1.54237e-05	51.5209	9.5033
11	15	Δ	72.3952	21.7938	2.84431	2714.92	25319.6	93.2632	0.980646	53.9288	5.60816	0.0578457	0.000222143	0.00154249	1.42623e-05	53.5666	11.2124
12	16	Δ	104.627	21.017	2.60133	2532.55	23528.6	92.9162	1.37396	42.9503	5.23143	0.0462432	0.000171003	0.00191043	1.67513e-05	51.8151	11.4825
13	17	Δ	116.837	22.6393	3.00135	2911.68	27103.2	93.0913	1.30948	43.7125	6.01459	0.0469732	0.000159116	0.00188489	1.62481e-05	55.303	11.7328
14	18.5	Δ	146.67	29.5531	3.1803	3062.42	28573.1	93.3035	1.51412	39.4759	6.32597	0.0423204	0.000134955	0.00202687	1.71334e-05	44.5584	7.11232
15	20	Δ	99.5241	23.9766	2.66573	2900.57	27089	93.391	1.15607	47.6749	5.99163	0.0510637	0.000178731	0.0017521	1.53772e-05	52.0191	10.0984
16	22	Δ	108.828	33.2753	3.16333	3310.81	30997.5	93.6181	1.0915	48.808	6.83907	0.0521475	0.000169527	0.00171412	1.48588e-05	42.7839	6.61871
17	25	Δ	146.446	38.2939	4.06673	4227.94	39775.2	94.0584	1.10442	47.6217	8.73356	0.0506352	0.000143739	0.00175388	1.47773e-05	47.4753	5.80446
18	28	Δ	104.946	33.6489	4.14488	3794.07	35692.7	94.0563	0.93119	53.2345	7.83733	0.0566066	0.000175918	0.00156577	1.35834e-05	48.4845	6.87507
19	30	Δ	97.013	22.8972	2.99245	2797.43	26240	93.7889	1.17556	47.5182	5.77858	0.0506742	0.000182102	0.00175735	1.54999e-05	52.5345	10.6733
20	31.5	Δ	45.576	18.0589	1.96117	2051.27	19274.2	93.9466	0.99561	58.5955	4.23726	0.062384	0.000307959	0.00138607	1.46833e-05	48.8428	12.9823
21	33	Δ	31.0377	8.15129	1.05262	1167.22	10882.6	93.2378	1.5026	53.9913	2.4111	0.057929	0.000447968	0.00154039	2.03162e-05	61.5738	36.9914
22	34.5	Δ	13.2452	6.48274	0.637091	724.068	6783.04	93.6713	2.11124	63.1459	1.49569	0.0674333	0.000901849	0.00123354	2.99837e-05	48.0274	38.2505
23	36	Δ	6.87546	3.7725	0.397524	455.951	4267.07	93.5803	3.25927	67.4899	0.941847	0.0721463	0.00159388	0.00108792	4.75663e-05	51.9706	64.8448
24	37.5	Δ	7.45278	2.8737	0.382932	445.477	4178.57	93.7885	3.33939	65.2256	0.920212	0.0695659	0.0015326	0.00116383	4.76048e-05	66.6581	106.958
25	39	Δ	8.05358	1.78491	0.300538	357.172	3352	93.8356	4.1728	58.2085	0.737803	0.062047	0.00157435	0.00139905	5.5564e-05	86.046	229.367
26	41	Δ	6.82305	3.58877	0.404559	393.555	3685.14	93.6298	3.77422	64.374	0.812958	0.0687766	0.00169963	0.00119238	5.34904e-05	47.1551	63.9631
27	45	Δ	11.6951	1.49613	0.425065	528.016	4950.43	93.745	2.86826	58.6178	1.09071	0.0625454	0.00108376	0.00138533	3.87135e-05	151.756	528.022
YS01-02, J = 0.00417804 ± 0.00000836										Stepwise heating
1	4		22.2484	3.08674	0.36989	30.5404	477.099	114.314	15.8826	6.70105	0.188547	0.00428963	1.54312e-05	0.00312496	2.56697e-05	4.25445	2.28618
2	5	Δ	29.0248	3.32512	0.402989	104.595	1380.12	97.0219	6.09468	13.7375	0.645734	0.0104118	2.3815e-05	0.00288926	2.36277e-05	13.526	7.54403
3	6.8	Δ	41.7327	5.38452	0.718752	367.577	4706.35	94.2192	2.50889	27.4131	2.2693	0.021413	4.57162e-05	0.00243112	1.99146e-05	29.3541	11.4727
4	7.8	Δ	25.1733	4.52856	0.59107	471.973	5988.81	93.3955	1.18578	44.3374	2.91381	0.0349492	7.26688e-05	0.00186406	1.51646e-05	44.8152	21.0387
5	9	Δ	59.3444	8.62863	1.01829	886.421	11218.5	93.1594	1.49987	38.7625	5.47248	0.0306334	6.73122e-05	0.00205086	1.6964e-05	44.174	11.6263
6	10.2	Δ	66.1892	11.5042	1.34759	1250.13	15831	93.2134	1.18215	44.4692	7.71789	0.0351234	7.36899e-05	0.00185964	1.51967e-05	46.7269	8.90924
7	11.5	Δ	85.508	16.6437	1.53667	1573.87	19934.2	93.2296	1.20611	43.8376	9.71655	0.0346183	7.17395e-05	0.00188081	1.5268e-05	40.6617	4.92709
8	14	Δ	70.3022	14.7786	1.36568	1505.47	19092.6	93.3473	1.03668	47.6231	9.29428	0.0375597	7.6823e-05	0.00175396	1.41977e-05	43.8034	5.48879
9	15	Δ	84.2607	13.78	1.43333	1390.36	17588.5	93.119	1.33638	41.1391	8.58362	0.0325265	6.78425e-05	0.00197122	1.59417e-05	43.3856	5.94892
10	16	Δ	29.6665	6.53648	0.677734	571.99	7271.74	93.5688	1.15028	45.0754	3.53129	0.0354635	7.23852e-05	0.00183933	1.49182e-05	37.6282	15.73
11	17	Δ	23.4688	5.6531	0.599167	535.976	6813.86	93.5683	0.977756	49.2904	3.30895	0.0387807	8.01669e-05	0.00169809	1.37821e-05	40.7687	17.4869
12	18.5	Δ	47.0735	9.09615	0.895259	779.047	9888.39	93.4246	1.3366	41.2923	4.80959	0.032538	6.67277e-05	0.00196609	1.59571e-05	36.8277	10.0178
13	20	Δ	41.356	8.12118	0.931229	790.473	10059.1	93.6578	1.16116	44.8846	4.88013	0.0352789	7.20872e-05	0.00184573	1.49903e-05	41.8539	9.89865
14	22	Δ	71.2168	13.46	1.28	1122.72	14185.6	93.0092	1.39869	40.0103	6.93129	0.0316721	6.44474e-05	0.00200905	1.62795e-05	35.8668	5.49565
15	30	Δ	54.3225	12.1356	1.2683	901.349	11367.2	92.8389	1.3531	41.1988	5.56464	0.0326745	6.64978e-05	0.00196923	1.63979e-05	31.9375	5.30194
16	31.5	Δ	43.6437	10.8789	0.946018	670.098	8474.48	93.0924	1.43993	39.4002	4.13697	0.0311605	6.58828e-05	0.00202949	1.64667e-05	26.4864	5.54578
17	33	Δ	25.631	8.9694	0.750752	494.458	6265.65	93.2726	1.15841	45.0086	3.05263	0.0355264	7.32876e-05	0.00184157	1.51029e-05	23.7047	6.1936
18	34.5	Δ	47.5903	10.392	1.07891	599.358	7590.52	93.22	1.75799	34.8147	3.70025	0.0274946	5.67536e-05	0.00218313	1.78935e-05	24.8003	5.31317
19	36	Δ	28.3996	8.43191	0.938035	539.239	6844.55	93.4248	1.1676	44.6576	3.32909	0.0351903	7.31927e-05	0.00185333	1.50429e-05	27.4995	5.58511
20	37.5	Δ	22.0206	8.13306	0.874135	379.791	4808.85	93.2015	1.28384	42.2363	2.34471	0.0333638	6.9903e-05	0.00193446	1.57237e-05	20.0798	4.7872
21	39	Δ	20.3776	7.31772	0.798129	344.656	4361.49	93.1498	1.30875	41.7468	2.1278	0.0329958	6.8959e-05	0.00195086	1.58603e-05	20.2525	5.72858
22	41	Δ	21.1419	8.59305	0.854078	348.902	4429.83	93.45	1.35846	41.2305	2.15401	0.0324803	6.80923e-05	0.00196816	1.63436e-05	17.4592	4.14993
23	43	Δ	13.8716	6.26368	0.773664	265.258	3336.39	92.5992	1.19052	44.6073	1.63762	0.0354723	7.31816e-05	0.00185501	1.57043e-05	18.2099	6.0059
24	45		10.5304	7.98009	0.824305	273.55	3351.59	90.26	0.872604	51.5854	1.68881	0.0421136	9.07575e-05	0.00162117	1.33571e-05	14.74	4.31608
YS01-03, J = 0.00427463 ± 0.00000854										Stepwise heating
1	2.5	Δ	1.6911	1.69047	0	0.546115	14.0377	188.483	407.015	2.70508	0.00281037	0.00105238	0.00165102	0.00325881	0.000145463	0.138913	0.336113
2	3.5	Δ	17.1205	2.77829	0.134493	12.5265	164.748	98.8899	33.1877	3.12241	0.064463	0.00237414	0.000162616	0.00324483	2.89326e-05	1.93875	2.17366
3	4.5	Δ	43.7073	3.39578	0.359309	89.2567	1007.28	85.1792	10.9388	7.16568	0.459325	0.00634984	6.30197e-05	0.00310939	2.4807e-05	11.3024	10.9909
4	5	Δ	9.16764	3.74904	0.111482	90.138	1118.72	93.4617	3.02368	29.0098	0.46386	0.0233772	0.000251418	0.00237762	2.48477e-05	10.3385	8.56891
5	5.5	Δ	8.23332	2.27752	0.0532067	113.277	1405.61	93.4428	2.29168	36.373	0.582934	0.0293178	0.000278857	0.00213092	2.2875e-05	21.3868	29.1551
6	6	Δ	6.47849	2.91216	0.00664935	139.468	1740.53	93.9653	1.70124	47.3539	0.717716	0.037953	0.000324114	0.00176298	2.09187e-05	20.5933	22.8561
7	6.5	Δ	11.8943	3.36166	0.0414113	177.314	2229.51	94.6547	1.8216	38.5613	0.912477	0.0306736	0.000205035	0.0020576	1.9083e-05	22.6807	21.3345
8	6.8	Δ	2.6964	2.27789	0.0368737	145.405	1826.09	94.5435	1.36387	69.3805	0.748272	0.0552634	0.000528839	0.00102481	2.09035e-05	27.4483	38.4426
9	7.1	Δ	2.25141	1.00563	0.0123251	158.775	1984.42	94.1012	1.23874	74.6711	0.817073	0.0597661	0.000550555	0.000847476	1.9955e-05	67.891	222.208
10	7.6	Δ	5.77467	2.95144	0.0674721	225.601	2826.24	94.3156	1.04689	62.0923	1.16097	0.0495792	0.000319552	0.00126907	1.55123e-05	32.8682	35.8987
11	8.1	Δ	9.47603	3.06262	0.133548	295.756	3698.75	94.1578	0.988793	56.6452	1.522	0.0453065	0.000239407	0.00145162	1.40163e-05	41.525	45.1351
12	8.7	Δ	45.0343	5.93491	0.257976	674.715	8331.1	92.9948	1.53982	38.2502	3.47216	0.0309836	0.000118419	0.00206802	1.67427e-05	48.8848	27.0445
13	9.5	Δ	43.2463	8.44902	0.548126	992.067	12285.7	93.262	1.02045	48.7466	5.10529	0.0393719	0.000144177	0.0017163	1.35459e-05	50.4898	19.3121
14	10	Δ	56.2717	2.38036	0.103675	538.978	6584.1	92.0278	2.30659	28.1519	2.77364	0.0230485	6.21281e-05	0.00240636	1.88711e-05	97.3639	131.501
15	10.5	Δ	40.8622	2.91672	0.351692	732.461	9092.56	93.4802	1.25789	42.6946	3.76933	0.0344001	8.74056e-05	0.0019191	1.51718e-05	107.984	110.839
16	11	Δ	35.0755	5.82899	0.306409	643.061	7965.36	93.2815	1.23797	43.193	3.30926	0.0348779	9.3483e-05	0.0019024	1.50943e-05	47.4381	26.7371
17	11.8	Δ	37.5564	6.05534	0.544163	862.409	10722.5	93.623	0.992586	48.8708	4.43806	0.039316	9.67115e-05	0.00171214	1.35466e-05	61.2411	33.8846
18	13.6	Δ	54.711	8.95245	0.550897	1060.18	13116.7	93.1753	1.15412	44.5275	5.4558	0.0359978	8.2953e-05	0.00185768	1.45629e-05	50.922	17.9956
19	14.6	Δ	55.0411	8.19663	0.655761	1050.85	13012.5	93.2535	1.16983	44.1823	5.40779	0.0356879	8.1924e-05	0.00186925	1.46393e-05	55.1282	22.2946
20	17.5	Δ	38.8954	7.38359	0.676743	1042.74	12939.9	93.4494	0.889266	52.6897	5.36608	0.0424699	0.000154835	0.00158417	1.24823e-05	60.7265	27.1215
21	18	Δ	73.4259	8.61717	0.528771	1103.05	13537.2	92.4432	1.47056	38.1696	5.67644	0.0311077	7.03406e-05	0.00207071	1.61311e-05	55.0428	20.6824
22	19.5	Δ	70.4555	12.5138	0.596097	1279.36	15686	92.3576	1.22447	42.7075	6.58372	0.0348398	7.70296e-05	0.00191866	1.5006e-05	43.9613	11.2314
23	21	Δ	56.1195	10.567	0.798305	1258.9	15610.3	93.3794	0.999458	48.2204	6.47843	0.0388965	8.69011e-05	0.00173394	1.35561e-05	51.2278	16.7134
24	22.5	Δ	41.4066	8.69429	0.559214	1016.56	12583.7	93.2235	0.958559	50.4314	5.23132	0.0407502	0.000148634	0.00165984	1.30637e-05	50.2767	19.0201
25	25	Δ	47.8311	5.79942	0.303867	713.573	8783.31	92.7109	1.49587	38.0757	3.67213	0.0309391	7.79577e-05	0.00207386	1.63098e-05	52.9082	28.6539
26	27	Δ	48.6163	7.72025	0.482763	860.218	10689	93.57	1.26474	42.4016	4.42678	0.0341304	8.16916e-05	0.00192892	1.51671e-05	47.9121	20.6926
27	30	Δ	43.5988	7.89105	0.546486	910.536	11274.3	93.2477	1.10786	46.4028	4.68572	0.0374842	0.000137768	0.00179484	1.41144e-05	49.617	20.0061
28	33	Δ	41.531	6.75516	0.428643	725.293	8962.37	93.0632	1.3125	41.9465	3.73244	0.0339527	0.000128011	0.00194416	1.53563e-05	46.1686	23.3007
29	36	Δ	32.1379	7.19024	0.542989	743.717	9231.96	93.4769	1.02528	49.0241	3.82725	0.0395026	0.000149788	0.00170701	1.36042e-05	44.4768	19.826
30	40	Δ	27.0748	7.24167	0.450913	748.264	9354.42	94.1243	0.887819	53.6305	3.85065	0.0429103	0.000162873	0.00155264	1.25418e-05	44.4309	20.2434
31	45	Δ	62.4246	8.72455	0.51615	1027.15	12733.4	93.3561	1.37243	40.5818	5.28582	0.0327421	0.000118677	0.00198989	1.55463e-05	50.6242	19.913
YS01-04 , J = 0.00423976 ± 0.00000847										Single-grain laser-fusion
1	45	Δ	6.62188	8.1166	0.12678	115.697	1455.3	93.9369	2.22983	42.3912	1.93399	0.033708	0.000145762	0.00192927	3.18668e-05	6.12937	14.5794
2	45	Δ	2.77522	0	0.173949	131.23	1663.03	94.6216	0.922747	66.7245	2.19363	0.0526689	0.000218473	0.00111383	1.91532e-05	1.88084	4.4952
3	45	Δ	15.3348	3.23071	0.300811	186.62	2345.8	93.8745	3.16602	33.873	3.11953	0.0269519	0.000110024	0.00221468	3.64955e-05	24.8387	157.637
4	45	Δ	12.4149	0	0.426314	300.113	3789.58	94.2909	1.61191	50.5414	5.01668	0.0400354	0.000161046	0.00165617	2.70307e-05	1.88084	4.4952
5	45	Δ	8.57569	7.32801	0.409054	330.796	4143.91	93.5623	1.06479	61.7918	5.52958	0.0493411	0.000199013	0.00127914	2.12553e-05	19.4108	55.7645
6	45	Δ	5.82922	0.789347	0.315105	283.134	3533.64	93.2229	0.866121	66.9795	4.73287	0.0536847	0.000216414	0.00110527	1.8132e-05	154.238	3854.22
7	45	Δ	31.2747	7.44229	0.416337	251.571	3172.5	94.1712	4.6994	25.3569	4.20526	0.0201098	8.1465e-05	0.0025	4.04998e-05	14.5352	40.6658
8	45	Δ	2.11063	0	0.197556	139.986	1766.79	94.247	0.719818	73.6845	2.34001	0.0584021	0.000240487	0.000880553	1.55292e-05	31.6413	133.569
9	45	Δ	2.04482	12.0179	0.161048	25.3666	318.86	93.8753	3.7632	34.304	0.424027	0.0272946	0.000188917	0.00220024	4.45471e-05	0.907612	1.54599
10	45	Δ	27.3669	7.10269	0.481117	283.115	3522.23	92.9356	3.66517	30.1185	4.73255	0.0242125	9.77429e-05	0.00234047	3.7937e-05	17.1399	47.8079
11	45	Δ	13.945	1.44621	0.335379	181.176	2286.47	94.2397	3.00093	35.4439	3.02854	0.0280899	0.000114994	0.00216205	3.60845e-05	53.8688	756.734
12	45	Δ	0.758237	0	0.0436081	124.952	1574.08	94.075	0.473252	87.3904	2.08869	0.0693998	0.000287138	0.000421134	8.64864e-06	1.88084	4.4952
13	45	Δ	11.1733	6.869	0.392823	392.267	4857.46	92.5137	1.14008	59.2685	6.55713	0.0478762	0.000192106	0.0013637	2.22507e-05	24.556	74.6414
14	45	Δ	6.05166	0	0.282527	263.842	3324.82	94.1043	0.948664	64.7712	4.41038	0.0514151	0.000207468	0.00117929	1.9335e-05	26.2247	175.193
15	45	Δ	10.6612	0	0.221138	127.894	1610.87	94.0596	3.49298	33.5974	2.13787	0.0266786	0.000111027	0.00222392	4.03404e-05	26.2247	175.193
16	45	Δ	2.32665	3.36335	0.272928	205.123	2552.41	92.9525	0.584012	78.5772	3.42883	0.063172	0.000256174	0.000716543	1.24107e-05	26.2247	175.193
17	45	Δ	9.33841	0	0.235109	255.999	3173.95	92.6246	1.43748	53.2225	4.27928	0.0429383	0.000173382	0.00156631	2.5682e-05	404.544	27448.1
18	45	Δ	3.53916	0	0.0393362	64.6235	809.63	93.5721	2.15581	43.373	1.08025	0.0346269	0.000151558	0.00189637	3.16262e-05	404.544	27448.1
19	45	Δ	22.755	3.71809	0.47227	234.912	2952.3	93.8576	3.66744	30.2879	3.92679	0.0241034	9.74162e-05	0.0023348	3.77982e-05	27.1678	167.004
20	45		5.93626	0	0.133622	65.5129	857.842	97.6859	3.47385	32.6106	1.09511	0.0249082	0.000107584	0.00225699	3.70638e-05	24.862	100.274
21	45	Δ	5.942	6.77321	0.235246	157.376	1967.02	93.3565	1.5064	52.5659	2.6307	0.0420673	0.000172311	0.00158832	2.64635e-05	9.9911	36.0116
22	45	Δ	16.1805	6.55292	0.419206	303.519	3840.58	94.4821	2.05491	44.2808	5.07363	0.0350022	0.000142715	0.00186596	3.04248e-05	19.9168	71.6564
23	45	Δ	25.8628	10.8208	0.445576	314.879	3980.99	94.4052	3.11724	34.0126	5.26352	0.0269068	0.000108317	0.00221001	3.58073e-05	12.5127	25.7065
24	45		61.8978	0	0.468987	290.956	3491.76	89.7288	8.02281	15.8906	4.86362	0.0132422	5.34303e-05	0.00281713	4.54983e-05	17.3037	34.2049
25	45	Δ	9.10614	2.29263	0.425392	416.659	5222.98	93.6226	0.915725	65.7458	6.96488	0.0524647	0.000211116	0.00114662	1.89543e-05	78.1476	785.474
26	45		16.4359	16.7467	0.198313	70.7054	809.707	85.7188	8.81202	14.1626	1.18191	0.012368	5.42734e-05	0.00287501	4.65967e-05	1.81548	2.43547
27	45		4.15465	7.33472	0.258307	242.466	2942.84	90.7217	0.774423	70.3238	4.05306	0.0579611	0.000235955	0.000993162	1.71789e-05	14.2146	42.4667
28	45		13.4578	0	0.332074	221.803	2868.79	96.5216	2.32109	41.6487	3.70765	0.0322072	0.000130011	0.00195416	3.1758e-05	18.1586	47.2594

## Sheet: Table S3 U-Pb dating
Table S3. Zircon SIMS U-Pb dating results
Analysis	Content (ppm)		Th/U		Isotopic ratios					Isotopic ages (Ma)
	Th	U			207Pb/235U	±1se (%)	206Pb/238U	±1se (%)		207Pb/235U	±1se (%)	206Pb/238U	±1se (%)
YS01@01	96.7817	179.915	0.537931		0.0909703	5.62851	0.0145105	1.55315		88.4068	4.77673	92.8682	1.43221
YS01@02	176.327	295.887	0.595925		0.096656	4.13363	0.0146812	1.57099		93.6849	3.70606	93.9532	1.46546
YS01@03	168.7	304.034	0.554873		0.0882967	5.84471	0.0143866	1.54603		85.9154	4.82638	92.0809	1.41364
YS01@04	192.79	278.901	0.691248		0.0887674	6.11543	0.0144959	1.57576		86.3545	5.07528	92.7757	1.45162
YS01@05	182.652	299.634	0.609585		0.089003	6.53329	0.0149904	1.57609		86.5742	5.43625	95.9175	1.50073
YS01@06	331.199	483.433	0.685098		0.0925163	3.84639	0.0149681	1.5216		89.8447	3.3127	95.7753	1.44671
YS01@07	307.962	440.822	0.698609		0.0855474	5.47899	0.0146895	1.51596		83.3471	4.39367	94.0061	1.41491
YS01@08	252.27	372.22	0.677746		0.0933406	4.82897	0.014605	1.5722		90.6106	4.19466	93.4692	1.45909
YS01@09	242.592	311.923	0.777731		0.0895872	5.85817	0.014521	1.5569		87.1188	4.90257	92.9355	1.43669
YS01@10	224.937	388.049	0.579661		0.0970983	5.07084	0.0145106	1.5239		94.0943	4.56722	92.8693	1.40524
YS01@11	167.542	279.425	0.599596		0.0858661	16.2198	0.0148503	1.6395		83.6451	13.1075	95.0273	1.54673
YS01@12	173.048	292.909	0.590792		0.0954022	6.66866	0.0148571	1.50744		92.5234	5.9145	95.0706	1.42277
YS01@13	177.859	361.228	0.492373		0.0919719	5.10727	0.0144938	1.53806		89.3386	4.37721	92.7623	1.41668
YS01@14	180.576	250.361	0.721262		0.0849514	10.0182	0.0146859	1.61024		82.7894	7.99633	93.9828	1.50254
YS01@15	247.409	343.9	0.71942		0.0919045	5.46643	0.014599	1.60981		89.276	4.6826	93.4306	1.49338
YS01@16	140.878	271.734	0.51844		0.0953807	7.71765	0.0146096	1.50283		92.5034	6.84658	93.4981	1.39513
YS01@17	250.662	382.093	0.656025		0.0918196	5.85243	0.0150146	2.15091		89.197	5.00982	96.0708	2.0514
YS01@18	251.015	376.812	0.666154		0.0834087	6.88147	0.0146535	1.55929		81.3446	5.39365	93.7768	1.45183
YS01@19	182.885	320.031	0.571459		0.0967385	6.52872	0.0144411	1.50107		93.7612	5.86419	92.4275	1.37765
YS01@20	271.272	434.882	0.623783		0.085269	7.79872	0.0147174	1.50483		83.0866	6.24081	94.1829	1.40715
YS01@21	275.348	394.809	0.697422		0.0948242	5.40702	0.0146795	1.50019		91.9874	4.7663	93.9425	1.39925
YS01@22	269.102	367.887	0.73148		0.0910891	6.10221	0.0147302	1.50108		88.5174	5.18599	94.2647	1.40485
YS01@23	208.13	289.147	0.719806		0.0893245	8.68701	0.0144908	1.53493		86.8739	7.2588	92.7434	1.41351
YS01@24	323.573	432.817	0.747599		0.102353	4.06804	0.0146965	1.52529		98.946	3.84252	94.0501	1.42428
YS01@25	264.861	366.08	0.723505		0.096341	6.50957	0.0148597	1.50008		93.3932	5.82496	95.087	1.41607
YS02@01	744.084	649.567	1.14551		0.096527	6.75683	0.0146568	1.43904		93.5654	6.05756	93.7978	1.34015
YS02@02	493.833	745.742	0.662204		0.0973553	2.73501	0.0146763	1.31705		94.3321	2.46677	93.922	1.22815
YS02@03	483.054	793.349	0.608879		0.0917346	3.95196	0.0145101	1.28076		89.118	3.37739	92.8658	1.18097
YS02@04	292.49	531.709	0.550094		0.0985116	7.2127	0.0145405	1.56454		95.4016	6.58899	93.0592	1.44565
YS02@05	199.986	443.259	0.451171		0.09936	3.91868	0.0145638	1.59427		96.1854	3.60256	93.2074	1.47545
YS02@06	240.997	502.908	0.479207		0.106622	6.27154	0.0144737	1.50591		102.871	6.15415	92.6344	1.38516
YS02@07	420.832	695.313	0.605241		0.0978307	5.97649	0.0144684	1.39143		94.7719	5.42219	92.6007	1.27939
YS02@08	1697.63	953.315	1.78076		0.0951684	3.80235	0.0147523	1.36223		92.3066	3.36057	94.4045	1.27676
YS02@09	415.779	672.573	0.618192		0.0965976	4.69386	0.0146956	1.75119		93.6308	4.20706	94.0446	1.63516
YS02@10	514.879	596.556	0.863086		0.0890943	6.41631	0.0143068	1.57709		86.6593	5.3437	91.5743	1.43416
YS02@11	304.692	457.145	0.666509		0.0836311	6.62309	0.0147983	1.53915		81.5531	5.20342	94.697	1.44703
YS02@12	293.114	499.856	0.586397		0.0927241	6.48199	0.0145016	1.47798		90.0378	5.60038	92.8123	1.36206
YS02@13	345.258	558.41	0.618288		0.104526	3.25867	0.0146974	1.39625		100.945	3.13609	94.0558	1.30385
YS02@14	208.624	400.488	0.520925		0.105933	3.70684	0.0146745	1.43601		102.238	3.61167	93.9103	1.33893
YS02@15	572.012	843.154	0.678419		0.0980031	3.12998	0.0146407	1.4496		94.9314	2.84063	93.6956	1.34853
YS02@16	331.291	490.378	0.675582		0.096899	3.41728	0.0146771	1.60606		93.9098	3.06986	93.9273	1.49776
YS02@17	343.266	467.394	0.734425		0.0870879	7.53988	0.014953	1.5838		84.787	6.15181	95.6799	1.50437
YS02@18	409.908	644.013	0.63649		0.0888835	5.25149	0.0144816	1.32241		86.4628	4.36199	92.6852	1.21703
YS02@19	291.859	478.715	0.609671		0.0871201	6.99055	0.0143636	1.53213		84.8171	5.70428	91.9352	1.39872
YS02@20	576.863	801.823	0.719439		0.0895037	4.90914	0.0145059	1.34248		87.041	4.10322	92.839	1.23753
YS03@01	305.792	478.826	0.638629		0.0863932	13.8539	0.0143617	1.38433		84.1379	11.2486	91.9231	1.26361
YS03@02	351.486	541.367	0.649256		0.0980338	3.22651	0.0145324	1.31097		94.9597	2.9292	93.0076	1.21066
YS03@03	403.689	641.563	0.629227		0.0996009	3.16021	0.0147324	1.33812		96.4079	2.9107	94.2782	1.2525
YS03@04	253.559	461.375	0.549573		0.0957768	6.1758	0.0144599	1.35006		92.8705	5.49586	92.5468	1.24063
YS03@05	223.887	385.452	0.580842		0.0872997	7.60773	0.0145633	1.68184		84.9848	6.22126	93.2039	1.55645
YS03@06	225.229	513.174	0.438893		0.0852646	6.39904	0.0142749	1.87969		83.0825	5.11766	91.3715	1.70562
YS03@07	466.593	700.528	0.666059		0.0981894	3.06464	0.0144236	1.23929		95.1036	2.78608	92.3166	1.13602
YS03@08	519.557	647.584	0.8023		0.0943202	4.61606	0.0146906	1.76255		91.5198	4.04787	94.0127	1.64521
YS03@09	389.943	599.889	0.650025		0.0850198	5.46837	0.0148011	1.53575		82.8535	4.36016	94.7145	1.44411
YS03@10	354.103	525.202	0.674224		0.0891507	6.11755	0.0141736	1.35158		86.7119	5.09723	90.7278	1.21778
YS03@11	202.445	356.634	0.567656		0.0973401	4.09489	0.0144369	1.58008		94.3181	3.69498	92.4006	1.44975
YS03@12	276.917	541.355	0.511524		0.0979485	3.60581	0.0148848	1.44949		94.8809	3.2715	95.2467	1.37058
YS03@13	316.505	534.686	0.591945		0.0951323	3.483	0.0147675	1.49101		92.2731	3.07683	94.5016	1.3989
YS03@14	361.045	570.912	0.632401		0.0861222	7.10365	0.0147079	1.44169		83.8846	5.73554	94.1225	1.34724
YS03@15	488.628	684.793	0.713542		0.096855	4.72712	0.014554	1.60646		93.8691	4.24725	93.1446	1.48574
YS03@16	508.945	267.512	1.90251		0.087052	10.7934	0.0146194	1.95713		84.7534	8.81459	93.5601	1.81813
YS03@17	401.348	567.365	0.70739		0.0924767	3.32316	0.0146096	1.39233		89.8079	2.86031	93.4983	1.29254
YS03@18	1276.63	1462.3	0.873033		0.0917885	5.60677	0.0148279	1.34465		89.1681	4.79753	94.8853	1.26666
YS03@19	474.662	690.624	0.687294		0.085985	5.16655	0.0144449	1.29064		83.7563	4.16216	92.4518	1.18481
YS03@20	412.08	647.55	0.636367		0.100475	3.17819	0.0145615	1.5598		97.215	2.95067	93.1923	1.44332
Monitor standard
SA01@01	2576.93	979.192	2.63169		0.686948	1.46861	0.0856609	1.16919		530.965	6.09062	529.824	5.94968
SA01@02	3952.25	1277.55	3.09361		0.690816	1.3916	0.0860151	1.1623		533.291	5.78959	531.927	5.93713
SA01@03	665.936	438.885	1.51734		0.683469	1.60967	0.0857091	1.07701		528.869	6.65739	530.11	5.48325
SA01@04	603.763	433.284	1.39346		0.702686	2.44218	0.0867487	1.77866		540.394	10.2857	536.28	9.15909
SA01@05	8299.24	1984.14	4.18279		0.690681	1.30086	0.0860826	0.975583		533.209	5.41044	532.327	4.98658
SA01@06	1168.65	630.206	1.8544		0.70629	1.70777	0.0865208	1.03257		542.541	7.20328	534.928	5.30271
SA01@07	7878.15	1924.24	4.09416		0.703259	1.21533	0.087032	1.06796		540.736	5.10802	537.96	5.51437
SA01@08	6928.88	1764.79	3.92617		0.706514	1.20386	0.0874065	0.961429		542.674	5.07344	540.18	4.98373
SA01@09	1193.19	608.564	1.96067		0.697095	1.45479	0.0875256	0.983678		537.055	6.0858	540.887	5.10551
SA01@10	7173.72	1800.61	3.98405		0.692578	1.36587	0.0867751	1.17023		534.348	5.69081	536.436	6.02625
SA01@11	6949.41	1738.03	3.99843		0.701448	1.1944	0.0867852	0.968173		539.656	5.01222	536.496	4.98587
SA01@12	466.628	317.551	1.46946		0.719653	2.38524	0.0877818	1.10573		550.462	10.1864	542.405	5.7547
SA01@13	6785.49	1716.87	3.95224		0.70121	1.33249	0.0872306	1.04448		539.512	5.59213	539.138	5.40439
SA01@14	1186.2	600.17	1.97644		0.695312	1.9562	0.0853211	1.24065		535.987	8.1794	527.806	6.29037
SA01@15	7581.6	1813.31	4.18108		0.695564	1.39073	0.0856385	1.15992		536.138	5.80947	529.691	5.90106
SA01@16	1057.86	573.023	1.8461		0.674916	1.74539	0.0852434	1.20017		523.697	7.16656	527.344	6.07993
SA01@17	7572.54	1794.37	4.22017		0.686941	1.438	0.0865541	1.17075		530.961	5.96324	535.125	6.01482
SA01@18	7465.3	1752.15	4.26066		0.685552	1.36737	0.0850874	1.139		530.124	5.66271	526.418	5.76019
SA01@19	6692.13	1638.75	4.08368		0.696417	1.75033	0.0863768	1.28857		536.649	7.32236	534.073	6.60794
SA01@20	2765.91	761.646	3.6315		0.687909	1.98127	0.0853729	1.39638		531.543	8.23218	528.114	7.08439
